# Supplementary material for: Mouse papillomavirus type 1 (MmuPV1) DNA is frequently integrated in benign tumors by microhomology-mediated end-joining
Source: PLoS Pathog. 2021 Aug 3;17(8):e1009812. doi: 10.1371/journal.ppat.1009812 (PMC8362953; doi:10.1371/journal.ppat.1009812)
Supplement: S8 Table — Data were from RNA-seq analysis. (XLSX) [file ppat.1009812.s011.xlsx]

## Sheet: S8 Table
S8 Table. Relative expression of 40 tumor-specific genes with MmuPV1 integration sites identified by targeted DNA-seq in ear tissues.
Gene symbol	3 ear tumors vs 3 ears infected P value	3 ear tumors vs 3 ears infected FC	mouse #2 ear tumor RPKM	mouse #2 ear infected RPKM
Dmd	0.0109936	-4.74776	2.14595	4.18175
Cadps2	0.0026889	-4.38895	0.048134	0.122086
Gpc6	0.00107195	-3.26912	0.592919	1.368
Pdzrn3	0.048868	-3.06343	9.01857	19.4936
Rasgrf2	0.000363749	-2.25459	0.319693	0.804875
Gsg1l	0.0782065	-2.15491	0.139418	0.150383
Csf2rb	0.0275128	-1.91433	2.16604	6.35063
Camta1	0.00130598	-1.91278	3.15368	7.22112
Nckap5	0.26453	-1.67912	1.21739	2.76868
Slc41a3	0.137234	-1.49302	0.655095	0.815554
Dpysl5	0.515813	-1.48556	1.04837	0.695367
Magi2	0.0342911	-1.45427	0.285914	0.394281
Sdk2	0.100658	-1.43683	0.590559	0.595074
Plekha5	0.00590871	-1.414	8.38745	11.5724
Lrif1	0.05261	-1.36677	2.03244	3.43816
Cep250	0.0934875	-1.35325	3.78447	5.36116
Vps13b	0.0420964	-1.229	16.8605	17.6141
D430042O09Rik	0.0993376	-1.12925	2.31477	2.80458
Cdkal1	0.129255	-1.12862	2.73099	3.21375
Klhl3	0.599106	-1.12247	0.471124	0.376538
Vti1a	0.434832	-1.07251	11.8086	13.5781
Osbpl9	0.536673	-1.07234	20.9151	17.015
Adgrl3	0.919373	-1.02203	2.48791	3.11478
Ywhag	0.205901	1.13223	22.5126	22.5523
Agps	0.204639	1.13229	9.37808	6.47834
Dgki	0.660527	1.20575	0.942901	0.274286
Cln8	0.000272182	1.66984	13.6022	8.92647
Dlgap1	0.108894	1.91192	0.0844136	0.0798848
Slc9b1	0.046582	3.86144	0.286862	0.101099
Bpifa1	#N/A	#N/A	#N/A	#N/A
Cdh12	#N/A	#N/A	#N/A	#N/A
Cntn5	#N/A	#N/A	#N/A	#N/A
Dcc	#N/A	#N/A	#N/A	#N/A
Dnah1	#N/A	#N/A	#N/A	#N/A
Gpc5	#N/A	#N/A	#N/A	#N/A
Lingo2	#N/A	#N/A	#N/A	#N/A
Nsd3	#N/A	#N/A	#N/A	#N/A
Sgk2	#N/A	#N/A	#N/A	#N/A
Tnni3k	#N/A	#N/A	#N/A	#N/A
Trpc5	#N/A	#N/A	#N/A	#N/A
