# Supplementary material for: Mouse papillomavirus type 1 (MmuPV1) DNA is frequently integrated in benign tumors by microhomology-mediated end-joining
Source: PLoS Pathog. 2021 Aug 3;17(8):e1009812. doi: 10.1371/journal.ppat.1009812 (PMC8362953; doi:10.1371/journal.ppat.1009812)
Supplement: S10 Table — (XLSX) [file ppat.1009812.s013.xlsx]

## Sheet: S10 Table
S10 Table. DNA oligoes used in the study
MmuPV1 (NC_014326)
Name		Sequence (5'-3')	Genome positon	orientation
oLLY46	Pr650	AGACGACTCGGTGAAAGCATTCGA	650-673	Forward
oLLY45	Pr2534	ATGAACAGCCTGGAAACACGTTTCGA	2534-2559	Forward
oLLY47	Pr2976	ATAAGTATCAGAGCGATTGTGA	2976-2997	Forward
oLLY44	Pr3140	TCCTCCTCAGCCAAAGAAGGGCAT	3140-3163	Forward
oXYX9	Pr3277	AGTACGACTCGGACAAGGAGA	3277-3297	Forward
oLLY31	Pr3742	ATTATGGTGTCTGCTGACAGAAG	3742-3764	Forward
oXYX14	Pr1938	GCAGCACTTCCGTATCCACT	1938-1919	Backward
oXYX10	Pr3299	GTTCTCCTTGTCCGAGTCGT	3299-3280	Backward
oXYX16	Pr4647	ATTGGATACACGCACCTGCT	4647-4628	Backward
oXYX11	Pr5452	TTCGTCTGTGCTCTGCACTT	5452-5433	Backward
MmuPV1TaqMan assay for ddPCR		Sequence (5'-3')	Genome positon
Forward primer	MmuPV1	GAGAAGGCCAGATTCATACAG	112-132
Backword primer	MmuPV1	CACTCTACCAAATCAGCCTC	260-241
Probe	MmuPV1	FAM-AAGGTGCTTGTATTGTGTGC-MGB	170-189
Mouse (mm10)
Name	Gene	Sequence (5'-3')	Genome positon (mm10)	orientation
oLLY374	Krt10	CTGCCCCTTAAGGTCCTCGA	chr11:99388739-99388758	Forward
oLLY375	Krt10	TGAGTTGCCATGCTTCTCGT	chr11:99388802-99388821	Forward
oMA1	Gapdh	ATGTTCCAGTATGACTCCAC	chr6:125163330-125163311	Forward
Adapter primer for Targeted DNA-Seq
Name		Sequence (5'-3')
oLLY 51		GTAATACGACTCACTATAGCG
